# Supplementary material
Source: PubMed Central journal article supplement (PMC2787108)
Supplement: 0903029106_0903029106SI.pdf [file 0903029106_0903029106SI.pdf]

# Supporting Information

Salzer et al. 10.1073/pnas.0903029106

## SI Text

PRISM (Parameter-elevation Regressions on Independent Slopes Model) is an analytical tool that uses point data from weather stations, a digital elevation model, and other spatial data sets to generate gridded estimates of climatic parameters using a regression-based approach in which weights are based on the physiographic similarity of each grid cell to weather stations. PRISM is designed to map climate in the most difficult situations. As Daly et al. [(2008) Physiographically-sensitive mapping

of temperature and precipitation across the conterminous United States. *International Journal of Climatology* 28:2031–2064] note, PRISM has been shown to work well in the complex regimes in the mountainous areas of the western United States characterized by sparse data coverage, large elevation gradients, rain shadows, and inversions. Thus, we are confident that PRISM data better represent climate conditions near our high-elevation tree-ring sites than do data from lower-elevation valley stations.



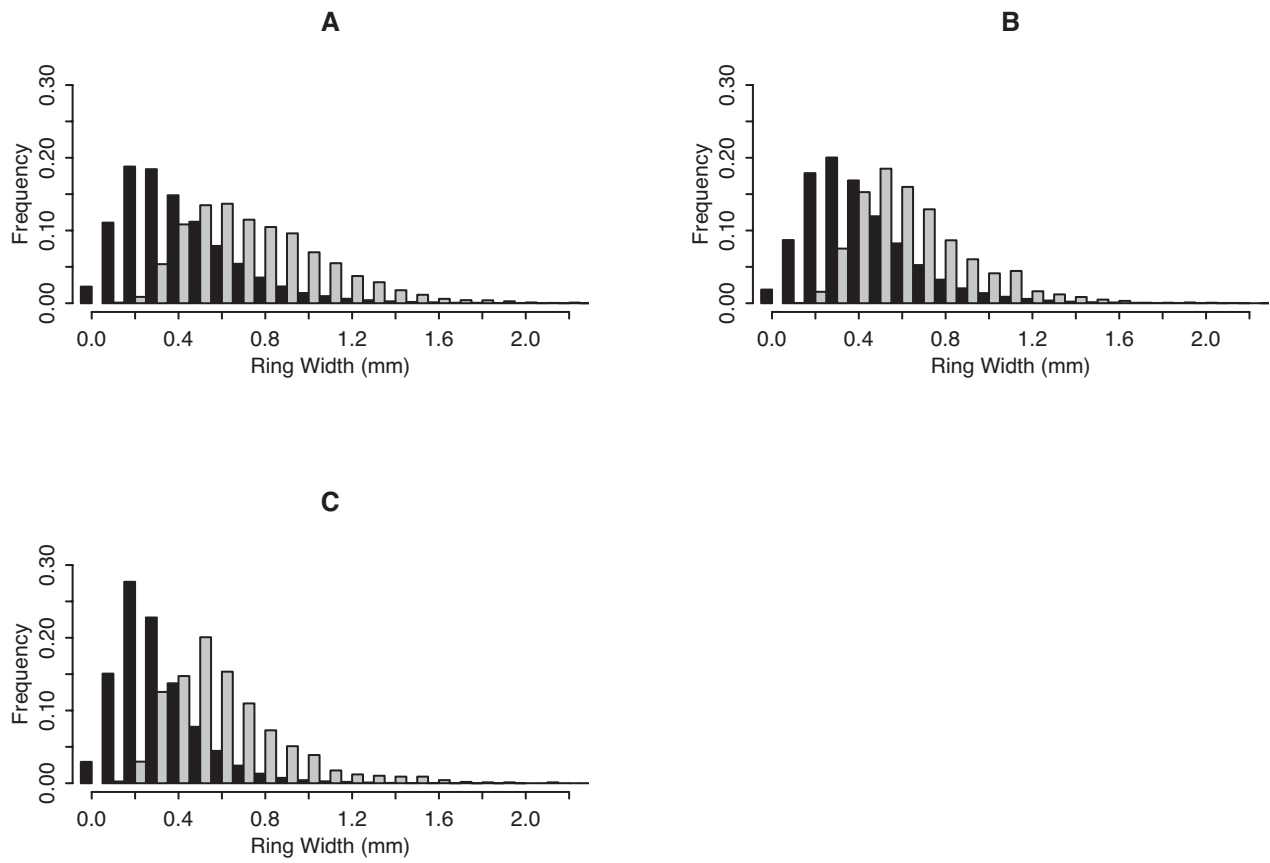

**Fig. S2.** Ring-width frequency distributions for the 3 upper-treeline sites. Sites are separated into pre-AD 1951 (*black*) and post-AD 1950 (*gray*) sets. Note the higher percentage of narrower rings in the earlier time period at each site. (A) SHP; (B) MWA; (C) PRL.

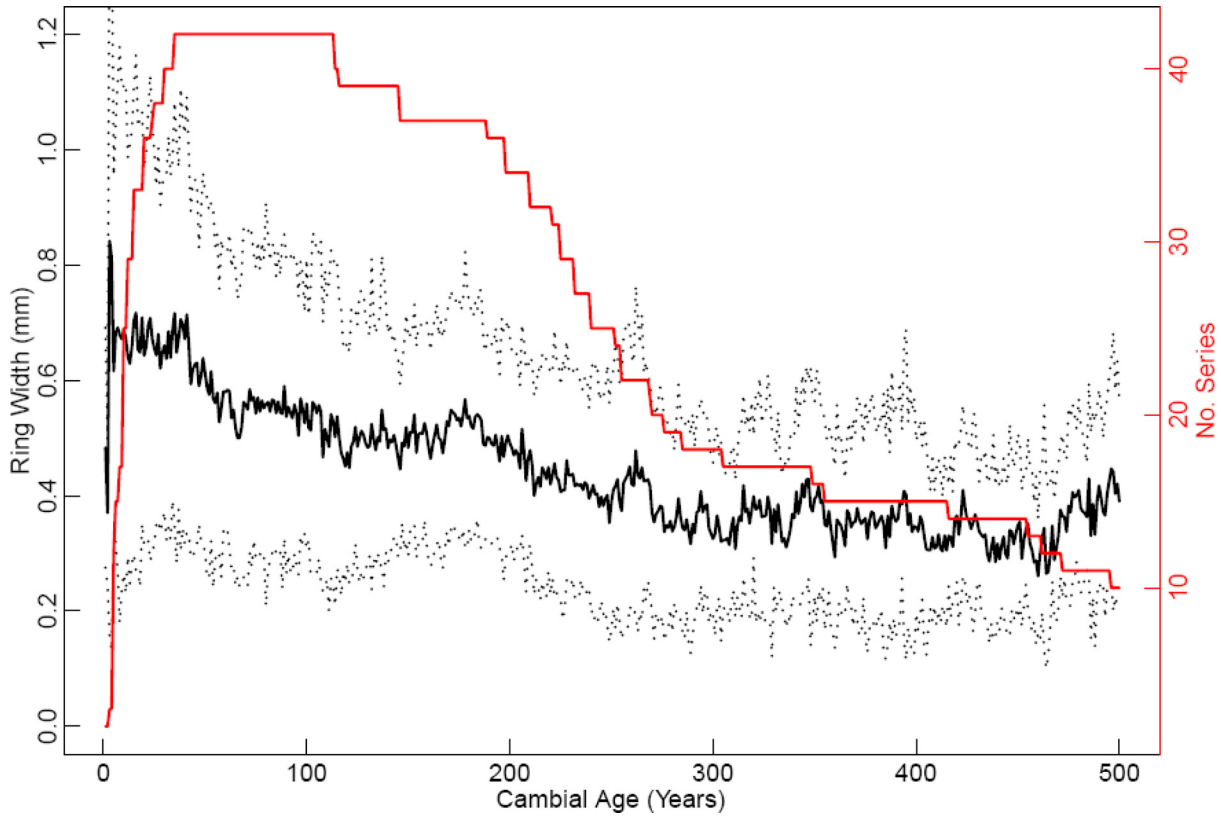

**Fig. S3.** Cambial age plot of ring width of upper-treeline *Pinus longaeva* at SHP (solid black line) with 1 standard deviation (dotted gray lines). Red line indicates number of samples. In general, trees grow larger rings earlier in life. When pith was not available, inner cambial age was estimated. The samples used are in data file SHPage.rwl (available at [http://www.ltrr.arizona.edu/pub/salzer\\_et\\_al.2009/](http://www.ltrr.arizona.edu/pub/salzer_et_al.2009/)); the first year of each series represents the size of the pith adjustment.

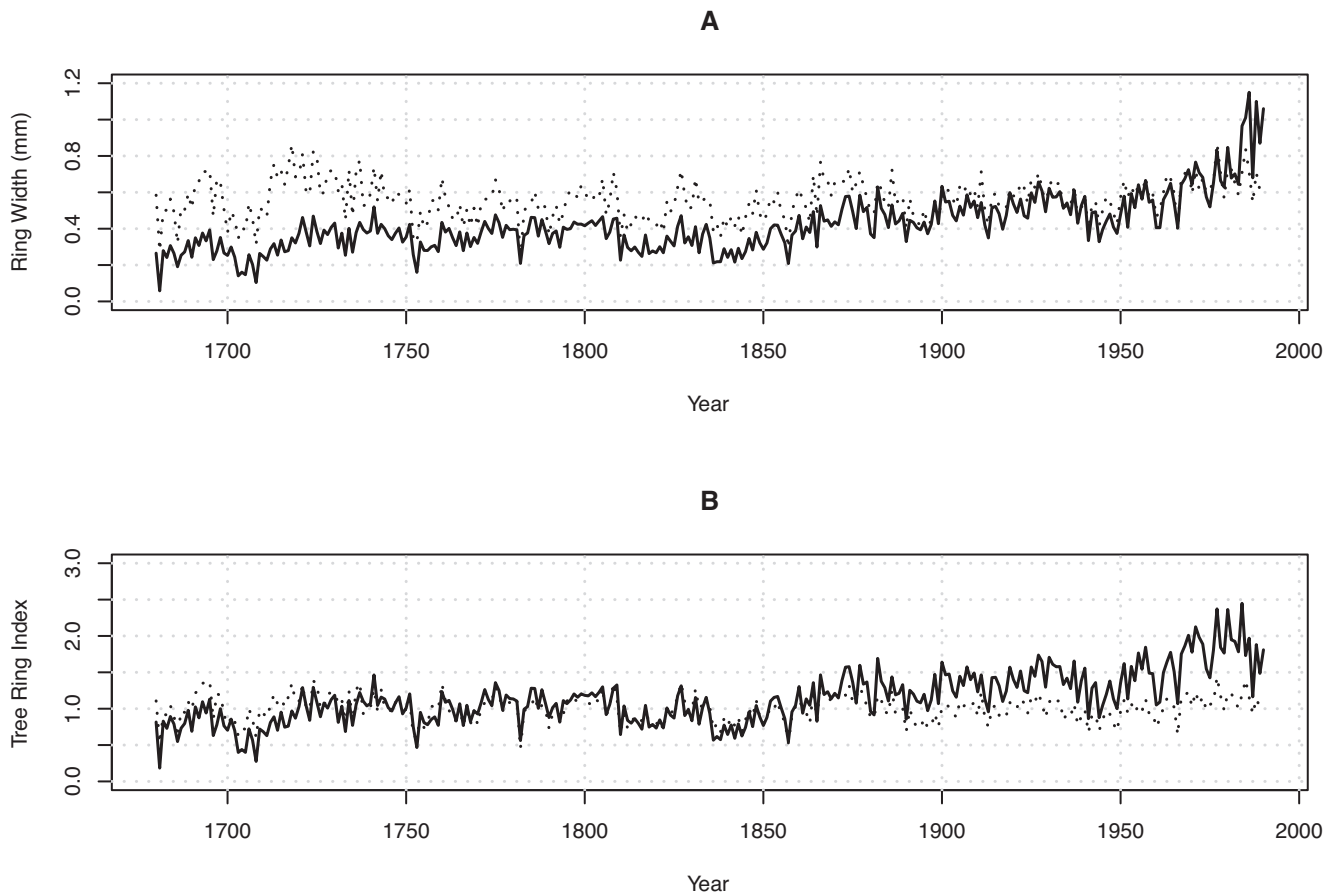

**Fig. S4.** Graybill and Idso (1) strip-bark (*solid line*) and whole-bark (*dotted line*) collections plotted as raw ring widths as in this study (A) and as standardized indices (e.g., figure 5 in reference 1) (B). Mean segment length = 1,052 years for strip-bark and 279 years for whole-bark. Note: the divergence in modern period is clearly a result of the standardization technique used by Graybill and Idso (1). A similar result was obtained by Ababneh (2), with little difference between strip-bark and whole-bark raw ring widths (figures 4 and 5, pp. 61–62) and more substantial differences after data processing (figures 6 and 7, pp. 62–63). Standardization calculations for panel A were performed using the program ARSTANL (available at <http://www.ltrr.arizona.edu/pub/dpl/>) (see legend for Table S2 for details regarding our strip-bark and whole-bark chronologies).

1. Graybill DA, Idso SB (1993) Detecting the aerial fertilization effect of atmospheric CO<sub>2</sub> enrichment in tree-ring chronologies. *Global Biogeochemical Cycles* 7:81–95.
2. Ababneh LN (2006) Analysis of radial growth patterns of strip-bark and whole-bark bristlecone pine trees in the White Mountains of California: Implications in paleoclimatology and archaeology of the Great Basin. Ph.D. dissertation (University of Arizona Geosciences, Tucson, AZ).

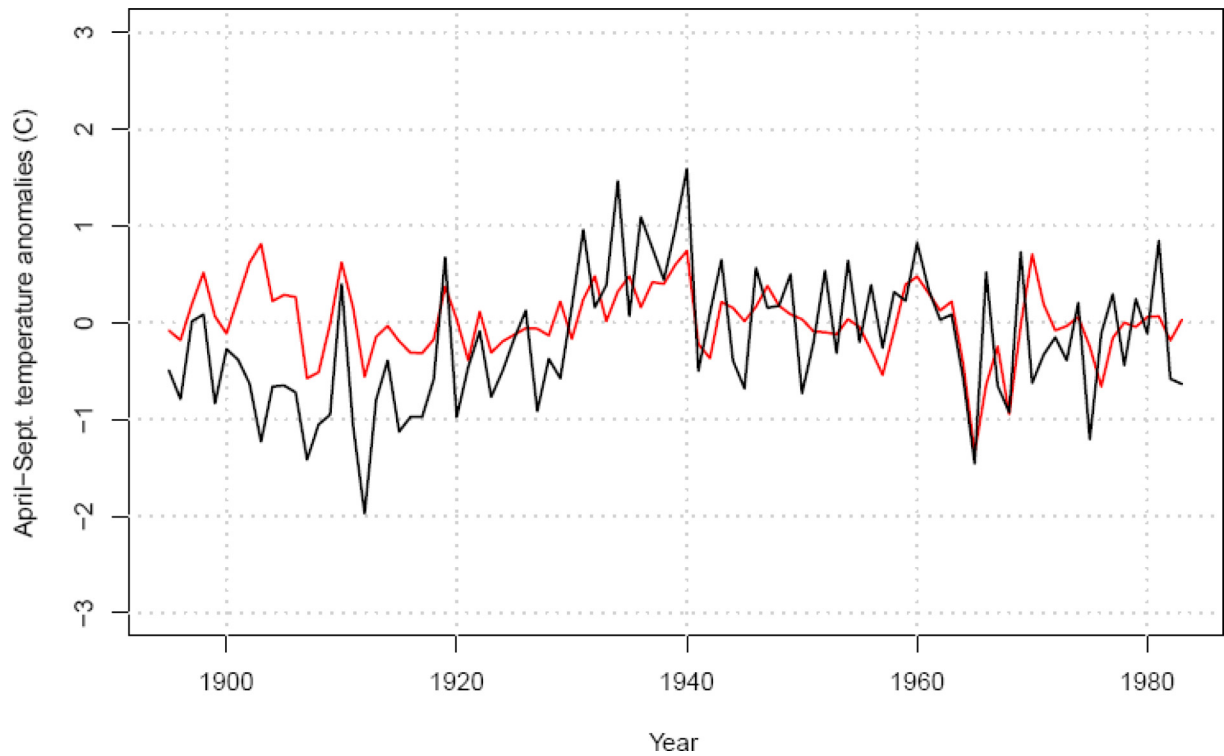

**Fig. S5.** Density-based temperature reconstruction (1) and PRISM (2) temperature. PRISM April-September mean temperature anomalies (with respect to the full period) at 8 density locations with a mean elevation of 2,751 m (*black*) and mean April-September temperature reconstruction of anomalies (2) for the grid points 37.5°N, 117.5°W and 37.5°N, 107.5°W (with respect to 1961–1990) (*red*). The locations used for the PRISM data in Fig. S5 are provided in Table S5.

1. Rutherford SD, et al. (2005) Proxy-based Northern Hemisphere surface temperature reconstructions: Sensitivity to method, predictor network, target season and target domain. *Journal of Climate* 18:2308–2329.
2. Daly C, et al. (2008) Physiographically-sensitive mapping of temperature and precipitation across the conterminous United States. *International Journal of Climatology* 28:2031–2064.

Table S1. Statistics for the measured ring widths from 3 upper-treeline bristlecone pine sites separated into 50-year bins

| Year  | Median | 25%  | 75%  | Mean | SD   | # of rings | # of series |
|-------|--------|------|------|------|------|------------|-------------|
| -2650 | 0.45   | 0.32 | 0.64 | 0.54 | 0.32 | 1197       | 28          |
| -2600 | 0.4    | 0.28 | 0.68 | 0.5  | 0.3  | 1461       | 33          |
| -2550 | 0.43   | 0.27 | 0.66 | 0.49 | 0.3  | 1586       | 33          |
| -2500 | 0.39   | 0.27 | 0.61 | 0.45 | 0.25 | 1759       | 39          |
| -2450 | 0.45   | 0.31 | 0.67 | 0.51 | 0.27 | 1930       | 42          |
| -2400 | 0.4    | 0.26 | 0.61 | 0.46 | 0.28 | 1920       | 40          |
| -2350 | 0.42   | 0.29 | 0.62 | 0.49 | 0.27 | 1711       | 40          |
| -2300 | 0.39   | 0.28 | 0.54 | 0.43 | 0.21 | 1354       | 31          |
| -2250 | 0.46   | 0.32 | 0.61 | 0.5  | 0.25 | 943        | 24          |
| -2200 | 0.42   | 0.3  | 0.64 | 0.48 | 0.24 | 639        | 15          |
| -2150 | 0.38   | 0.25 | 0.64 | 0.45 | 0.26 | 473        | 11          |
| -2100 | 0.45   | 0.3  | 0.69 | 0.49 | 0.25 | 405        | 9           |
| -2050 | 0.37   | 0.26 | 0.54 | 0.44 | 0.27 | 248        | 6           |
| -2000 | 0.4    | 0.27 | 0.57 | 0.44 | 0.23 | 398        | 9           |
| -1950 | 0.43   | 0.23 | 0.64 | 0.48 | 0.31 | 531        | 12          |
| -1900 | 0.47   | 0.26 | 0.76 | 0.56 | 0.37 | 650        | 13          |
| -1850 | 0.52   | 0.33 | 0.76 | 0.56 | 0.3  | 856        | 19          |
| -1800 | 0.48   | 0.29 | 0.75 | 0.55 | 0.34 | 1003       | 21          |
| -1750 | 0.57   | 0.36 | 0.86 | 0.64 | 0.35 | 961        | 21          |
| -1700 | 0.53   | 0.36 | 0.72 | 0.57 | 0.28 | 987        | 21          |
| -1650 | 0.45   | 0.33 | 0.61 | 0.51 | 0.33 | 1005       | 23          |
| -1600 | 0.52   | 0.37 | 0.73 | 0.62 | 0.41 | 1012       | 23          |
| -1550 | 0.52   | 0.32 | 0.75 | 0.61 | 0.42 | 988        | 22          |
| -1500 | 0.51   | 0.32 | 0.7  | 0.55 | 0.33 | 1064       | 24          |
| -1450 | 0.52   | 0.32 | 0.76 | 0.57 | 0.32 | 1327       | 30          |
| -1400 | 0.44   | 0.27 | 0.64 | 0.48 | 0.29 | 1214       | 26          |
| -1350 | 0.53   | 0.36 | 0.7  | 0.57 | 0.3  | 1323       | 29          |
| -1300 | 0.52   | 0.35 | 0.7  | 0.55 | 0.29 | 1492       | 35          |
| -1250 | 0.47   | 0.33 | 0.65 | 0.51 | 0.24 | 1820       | 43          |
| -1200 | 0.45   | 0.31 | 0.65 | 0.5  | 0.25 | 1918       | 40          |
| -1150 | 0.4    | 0.29 | 0.52 | 0.44 | 0.26 | 1901       | 45          |
| -1100 | 0.44   | 0.32 | 0.59 | 0.49 | 0.27 | 2097       | 46          |
| -1050 | 0.46   | 0.33 | 0.62 | 0.51 | 0.27 | 2033       | 42          |
| -1000 | 0.43   | 0.29 | 0.62 | 0.48 | 0.24 | 1924       | 41          |
| -950  | 0.43   | 0.3  | 0.6  | 0.51 | 0.3  | 1721       | 39          |
| -900  | 0.37   | 0.26 | 0.53 | 0.42 | 0.24 | 1660       | 37          |
| -850  | 0.35   | 0.25 | 0.49 | 0.39 | 0.2  | 1628       | 34          |
| -800  | 0.35   | 0.26 | 0.48 | 0.39 | 0.21 | 1575       | 33          |
| -750  | 0.35   | 0.25 | 0.5  | 0.4  | 0.23 | 1522       | 31          |
| -700  | 0.39   | 0.29 | 0.57 | 0.45 | 0.25 | 1632       | 38          |
| -650  | 0.42   | 0.3  | 0.6  | 0.47 | 0.24 | 1823       | 39          |
| -600  | 0.41   | 0.28 | 0.58 | 0.46 | 0.25 | 1683       | 39          |
| -550  | 0.42   | 0.3  | 0.62 | 0.48 | 0.25 | 1650       | 36          |
| -500  | 0.36   | 0.25 | 0.56 | 0.45 | 0.29 | 1695       | 36          |
| -450  | 0.37   | 0.25 | 0.6  | 0.47 | 0.32 | 1764       | 40          |
| -400  | 0.42   | 0.27 | 0.64 | 0.48 | 0.28 | 1928       | 44          |
| -350  | 0.41   | 0.29 | 0.58 | 0.49 | 0.31 | 2157       | 48          |
| -300  | 0.4    | 0.28 | 0.59 | 0.49 | 0.34 | 2288       | 49          |
| -250  | 0.4    | 0.28 | 0.57 | 0.47 | 0.3  | 2258       | 51          |
| -200  | 0.33   | 0.25 | 0.47 | 0.39 | 0.24 | 2129       | 46          |
| -150  | 0.31   | 0.23 | 0.46 | 0.37 | 0.22 | 2116       | 43          |
| -100  | 0.31   | 0.23 | 0.46 | 0.37 | 0.2  | 2053       | 44          |
| -50   | 0.31   | 0.22 | 0.44 | 0.35 | 0.19 | 1947       | 44          |
| 0     | 0.34   | 0.25 | 0.46 | 0.37 | 0.19 | 1939       | 44          |
| 50    | 0.35   | 0.25 | 0.46 | 0.38 | 0.2  | 2031       | 44          |
| 100   | 0.29   | 0.2  | 0.42 | 0.33 | 0.18 | 2139       | 46          |
| 150   | 0.33   | 0.23 | 0.46 | 0.36 | 0.19 | 2073       | 48          |
| 200   | 0.36   | 0.26 | 0.51 | 0.42 | 0.22 | 2387       | 57          |
| 250   | 0.34   | 0.24 | 0.5  | 0.41 | 0.26 | 2959       | 63          |
| 300   | 0.37   | 0.26 | 0.56 | 0.45 | 0.28 | 3055       | 66          |
| 350   | 0.38   | 0.26 | 0.55 | 0.44 | 0.26 | 2874       | 63          |
| 400   | 0.39   | 0.27 | 0.57 | 0.46 | 0.27 | 3349       | 72          |
| 450   | 0.38   | 0.26 | 0.56 | 0.44 | 0.26 | 3580       | 83          |
| 500   | 0.39   | 0.27 | 0.56 | 0.44 | 0.24 | 3839       | 82          |

| Year | Median | 25%  | 75%  | Mean | SD   | # of rings | # of series |
|------|--------|------|------|------|------|------------|-------------|
| 550  | 0.36   | 0.25 | 0.51 | 0.4  | 0.2  | 3657       | 80          |
| 600  | 0.39   | 0.28 | 0.54 | 0.44 | 0.22 | 3588       | 83          |
| 650  | 0.35   | 0.24 | 0.51 | 0.4  | 0.23 | 3854       | 85          |
| 700  | 0.33   | 0.24 | 0.47 | 0.38 | 0.21 | 4581       | 96          |
| 750  | 0.34   | 0.24 | 0.5  | 0.4  | 0.23 | 4480       | 101         |
| 800  | 0.32   | 0.23 | 0.46 | 0.37 | 0.21 | 4818       | 109         |
| 850  | 0.33   | 0.24 | 0.47 | 0.38 | 0.21 | 5507       | 120         |
| 900  | 0.32   | 0.22 | 0.46 | 0.37 | 0.23 | 5742       | 122         |
| 950  | 0.36   | 0.23 | 0.52 | 0.41 | 0.25 | 5939       | 126         |
| 1000 | 0.33   | 0.23 | 0.49 | 0.38 | 0.22 | 5934       | 131         |
| 1050 | 0.38   | 0.25 | 0.58 | 0.44 | 0.26 | 6004       | 132         |
| 1100 | 0.32   | 0.22 | 0.47 | 0.37 | 0.24 | 6194       | 140         |
| 1150 | 0.4    | 0.28 | 0.58 | 0.47 | 0.27 | 6906       | 150         |
| 1200 | 0.37   | 0.26 | 0.53 | 0.41 | 0.22 | 7070       | 150         |
| 1250 | 0.36   | 0.24 | 0.51 | 0.4  | 0.22 | 7323       | 156         |
| 1300 | 0.35   | 0.24 | 0.49 | 0.39 | 0.23 | 7064       | 154         |
| 1350 | 0.35   | 0.25 | 0.5  | 0.41 | 0.25 | 7073       | 152         |
| 1400 | 0.39   | 0.28 | 0.56 | 0.45 | 0.25 | 7289       | 160         |
| 1450 | 0.26   | 0.18 | 0.38 | 0.3  | 0.19 | 7770       | 170         |
| 1500 | 0.4    | 0.28 | 0.57 | 0.45 | 0.26 | 8607       | 182         |
| 1550 | 0.38   | 0.27 | 0.55 | 0.44 | 0.26 | 9436       | 198         |
| 1600 | 0.31   | 0.22 | 0.44 | 0.35 | 0.21 | 9863       | 209         |
| 1650 | 0.36   | 0.25 | 0.51 | 0.4  | 0.23 | 10536      | 217         |
| 1700 | 0.38   | 0.26 | 0.55 | 0.43 | 0.23 | 10741      | 224         |
| 1750 | 0.43   | 0.3  | 0.59 | 0.47 | 0.22 | 10552      | 219         |
| 1800 | 0.38   | 0.28 | 0.52 | 0.42 | 0.2  | 10671      | 221         |
| 1850 | 0.45   | 0.33 | 0.61 | 0.49 | 0.22 | 10970      | 225         |
| 1900 | 0.51   | 0.37 | 0.7  | 0.56 | 0.26 | 10975      | 226         |
| 1950 | 0.58   | 0.42 | 0.81 | 0.64 | 0.31 | 9008       | 217         |



**Table S2. Statistics for strip-bark (s-b) and whole-bark (w-b) tree-ring chronologies for Cottonwood Lower (CWL) and Sheep Mountain (SHP)**

| Statistic                      | CWL s-b            | CWL w-b            | SHP s-b            | SHP w-b            |
|--------------------------------|--------------------|--------------------|--------------------|--------------------|
| Mean bark coverage (%)*        | 64                 | 100                | 53                 | 100                |
| Mean elevation (m)             | 3186               | 3200               | 3471               | 3470               |
| Length of chronology           | AD 1400–2006       | AD 1400–2006       | AD 1400–2005       | AD 1400–2005       |
| Number of series               | 10 trees, 19 radii | 10 trees, 21 radii | 24 trees, 35 radii | 10 trees, 16 radii |
| Mean RW (mm)                   | 0.396              | 0.458              | 0.473              | 0.552              |
| SD (mm)                        | 0.115              | 0.130              | 0.153              | 0.166              |
| Mean sensitivity               | 0.217              | 0.190              | 0.162              | 0.160              |
| First-order autocorrelation    | 0.640              | 0.655              | 0.823              | 0.797              |
| Common interval statistics†    | AD 1400–2006       | AD 1581–2006       | AD 1458–2005       | AD 1694–2005       |
| Number of series               | 7 trees, 10 radii  | 8 trees, 15 radii  | 15 trees, 16 radii | 10 trees, 15 radii |
| Mean correlation between radii | 0.422              | 0.452              | 0.449              | 0.461              |
| Signal/noise ratio             | 4.57               | 6.01               | 12.07              | 8.47               |
| Variation in 1st eigenvector‡  | 49.18%             | 50.85%             | 52.60%             | 51.61%             |
| SSS > 0.85 (# trees, 1st year) | 4 trees AD 1400    | 4 trees AD 1400    | 5 trees AD 1400    | 4 trees AD 1536    |

Strip-bark and whole-bark chronologies.

\*Proportion of circumference of stem covered by bark.

†Period with no missing data.

‡% variance represented by 1st eigenvector.

Statistics calculated using program ARSTANL, version 6.04P, available at: <http://www.ltr.arizona.edu/software.html>.

Measurements used began with samples from AD 1400.

All dated available samples from 2005/2006 collections at SHP and CWL with known bark percentage were used.

Sample numbers are:

CWL strip-bark samples: CWL 02a,b; 04a,b; 05a,b; 07a,b; 08a; 12a,b; 13a,b; 14a,b; 17c,d; 19a,b.

CWL whole-bark samples: CWL 01a,b; 03a,b; 06a,b; 10a,b; 11a,b,c; 15a,b; 16a,b; 18a,b; 20a,b; 21a,b.

SHP strip-bark samples: SH 901b; 907a,b,o; 910a,b; 913a,b; 918a; 922a,b,o; 927a; 929a; 933a; 937a; 943a; 945a; 948a; 950a,b; 952a; 953a,b; 957c; 958a,c; 959a; 960a,b; 961a; 963a; 965a,b; 968a.

SHP whole-bark samples: SH 912a,b; 919a,b; 925b; 926a,b; 935a,b; 954a; 955a; 964a,b; 969a; 970a,b.

RW = ring width; SSS = subsample signal strength.

**Table S3. Correlation of White Mountain ring-width (rw) chronologies in the elevational transect shown in Fig. 4**

| Time period                | SHPrw        | PALrw          | CWLrw         |
|----------------------------|--------------|----------------|---------------|
| AD 1400–1996*              |              |                |               |
| PALrw                      | 0.32         |                |               |
| CWLrw                      | 0.26         | 0.82           |               |
| MWKrw                      | 0.07         | 0.64           | 0.77          |
| AD 1400–1850†              |              |                |               |
| PALrw                      | 0.31         |                |               |
| CWLrw                      | 0.34         | 0.82           |               |
| MWKrw                      | 0.26         | 0.70           | 0.79          |
| AD 1851–1996‡              |              |                |               |
| PALrw                      | 0.32         |                |               |
| CWLrw                      | 0.31         | 0.85           |               |
| MWKrw                      | 0.22         | 0.65           | 0.78          |
| 1st-order autocorrelation§ | Whole Period | Before AD 1851 | After AD 1850 |
| SHPrw                      | 0.74         | 0.63           | 0.54          |
| PALrw                      | 0.49         | 0.48           | 0.49          |
| CWLrw                      | 0.51         | 0.49           | 0.58          |
| MWKrw                      | 0.34         | 0.29           | 0.34          |
| N                          | 597          | 451            | 146           |

\*The maximum period (AD 1400–1996);  $n = 597$ .

†AD 1400–1850;  $n = 451$ .

‡AD 1851–1996;  $n = 146$ .

§First-order autocorrelations for each ring-width chronology starting in AD 1400.

Note that the pattern does not change when only the years before or after AD 1851 are included and that SHPrw is relatively weakly related to PALrw, CWLrw and MWKrw, whereas these latter 3 are more strongly correlated with each another. Note also that the pattern of increasing autocorrelation with increasing elevation and markedly higher autocorrelation at the highest elevation (SHPrw) is clearly present before AD 1850.

**Table S4. Correlations between seasonal PRISM climate data (PRISM details in data file PRISM.xls) and ring width using both an ordinary least squares approach (ols) and a generalized least squares approach (gls) where errors from the model can be correlated**

| Site | Season | ClimVar  | gls.b1           | Gls pval        | ols.r            | ols.pval        | Neff |
|------|--------|----------|------------------|-----------------|------------------|-----------------|------|
| MWK  | pSpr   | Precip   | -0.000009        | 0.923772        | 0.155029         | 0.121623        | 101  |
| MWK  | pSum   | Preci    | 0.000262         | 0.078907        | 0.219555         | 0.027382        | 101  |
| MWK  | pAut   | Precip   | 0.000328         | 0.014372        | 0.205662         | 0.039088        | 101  |
| MWK  | Win    | Precip   | 0.000129         | 0.012507        | <b>0.261947</b>  | <b>0.008141</b> | 101  |
| MWK  | Spr    | Precip   | <b>0.000280</b>  | <b>0.001324</b> | <b>0.322658</b>  | <b>0.000999</b> | 101  |
| MWK  | Sum    | Precip   | -0.000073        | 0.627978        | 0.062593         | 0.534053        | 101  |
| MWK  | Aut    | Precip   | -0.000275        | 0.036192        | -0.093593        | 0.351888        | 101  |
| MWK  | pSpr   | Avg Temp | 0.000091         | 0.979198        | -0.163110        | 0.133471        | 86   |
| MWK  | pSum   | Avg Temp | -0.013206        | 0.019098        | <b>-0.309617</b> | <b>0.009101</b> | 70   |
| MWK  | pAut   | Avg Temp | -0.011259        | 0.030659        | <b>-0.305575</b> | <b>0.006171</b> | 79   |
| MWK  | Win    | Avg Temp | 0.001522         | 0.668354        | 0.084756         | 0.399397        | 101  |
| MWK  | Spr    | Avg Temp | <b>-0.009725</b> | <b>0.004291</b> | <b>-0.297365</b> | <b>0.005428</b> | 86   |
| MWK  | Sum    | Avg Temp | -0.005523        | 0.328870        | -0.223263        | 0.059408        | 72   |
| MWK  | Aut    | Avg Temp | -0.004181        | 0.426677        | -0.200860        | 0.074014        | 80   |
| CWL  | pSpr   | Precip   | -0.000185        | 0.193732        | 0.063122         | 0.510437        | 111  |
| CWL  | pSum   | Precip   | 0.000172         | 0.355664        | 0.179200         | 0.059852        | 111  |
| CWL  | pAut   | Precip   | 0.000328         | 0.114804        | 0.067097         | 0.484119        | 111  |
| CWL  | Win    | Precip   | 0.000191         | 0.029200        | 0.230363         | 0.015001        | 111  |
| CWL  | Spr    | Precip   | 0.000347         | 0.010790        | 0.148922         | 0.118775        | 111  |
| CWL  | Sum    | Precip   | 0.000030         | 0.874128        | 0.105385         | 0.270984        | 111  |
| CWL  | Aut    | Precip   | -0.000432        | 0.036948        | -0.152905        | 0.109122        | 111  |
| CWL  | pSpr   | Avg Temp | 0.000923         | 0.850887        | -0.258052        | 0.016447        | 90   |
| CWL  | pSum   | Avg Temp | -0.010656        | 0.222783        | <b>-0.355548</b> | <b>0.007163</b> | 59   |
| CWL  | pAut   | Avg Temp | -0.006535        | 0.320951        | -0.275133        | 0.011311        | 88   |
| CWL  | Win    | Avg Temp | 0.000076         | 0.987206        | -0.009108        | 0.924413        | 111  |
| CWL  | Spr    | Avg Temp | -0.009897        | 0.043558        | <b>-0.309385</b> | <b>0.003748</b> | 90   |
| CWL  | Sum    | Avg Temp | -0.008966        | 0.303124        | -0.329793        | 0.013059        | 58   |
| CWL  | Aut    | Avg Temp | -0.000788        | 0.904301        | -0.235043        | 0.032442        | 88   |
| PAL  | pSpr   | Precip   | -0.000228        | 0.110668        | -0.028246        | 0.768540        | 111  |
| PAL  | pSum   | Precip   | 0.000318         | 0.106496        | 0.209182         | 0.027570        | 111  |
| PAL  | pAut   | Precip   | 0.000420         | 0.052935        | 0.081861         | 0.393030        | 111  |
| PAL  | Win    | Precip   | 0.000089         | 0.326838        | 0.124587         | 0.192634        | 111  |
| PAL  | Spr    | Precip   | 0.000274         | 0.049139        | 0.116314         | 0.224096        | 111  |
| PAL  | Sum    | Precip   | -0.000192        | 0.331528        | 0.033041         | 0.730651        | 111  |
| PAL  | Aut    | Precip   | -0.000361        | 0.098940        | -0.141407        | 0.138766        | 111  |
| PAL  | pSpr   | Avg Temp | -0.000351        | 0.950065        | <b>-0.269658</b> | <b>0.008951</b> | 89   |
| PAL  | pSum   | Avg Temp | <b>-0.025807</b> | <b>0.007763</b> | <b>-0.417992</b> | <b>0.000531</b> | 62   |
| PAL  | pAut   | Avg Temp | -0.017174        | 0.022724        | <b>-0.352598</b> | <b>0.000608</b> | 87   |
| PAL  | Win    | Avg Temp | 0.003177         | 0.554318        | 0.020094         | 0.834190        | 111  |
| PAL  | Spr    | Avg Temp | <b>-0.014603</b> | <b>0.009067</b> | <b>-0.361740</b> | <b>0.000367</b> | 89   |
| PAL  | Sum    | Avg Temp | -0.001672        | 0.867179        | <b>-0.350752</b> | <b>0.004489</b> | 62   |
| PAL  | Aut    | Avg Temp | -0.000719        | 0.923948        | <b>-0.270084</b> | <b>0.009622</b> | 86   |
| SHP  | pSpr   | Precip   | -9.99E-05        | 0.382004        | 0.052559         | 0.585529        | 110  |
| SHP  | pSum   | Precip   | <b>0.000526</b>  | <b>0.007763</b> | <b>0.317272</b>  | <b>0.000732</b> | 110  |
| SHP  | pAut   | Precip   | 4.41E-05         | 0.814002        | 0.115742         | 0.228552        | 110  |
| SHP  | Win    | Precip   | 8.54E-05         | 0.26628         | 0.16737          | 0.080518        | 110  |
| SHP  | Spr    | Precip   | 6.74E-05         | 0.558024        | 0.104225         | 0.278548        | 110  |
| SHP  | Sum    | Precip   | -0.00021         | 0.293677        | 0.060846         | 0.527743        | 110  |
| SHP  | Aut    | Precip   | 2.60E-05         | 0.888631        | 0.075324         | 0.434163        | 110  |
| SHP  | pSpr   | Avg Temp | 0.009441         | 0.093488        | 0.26336          | 0.01166         | 90   |
| SHP  | pSum   | Avg Temp | 0.005254         | 0.573155        | 0.264234         | 0.025968        | 68   |
| SHP  | pAut   | Avg Temp | <b>0.02461</b>   | <b>0.001248</b> | <b>0.348941</b>  | <b>0.000862</b> | 87   |
| SHP  | Win    | Avg Temp | 0.009877         | 0.080468        | 0.226571         | 0.017304        | 110  |
| SHP  | Spr    | Avg Temp | 0.008874         | 0.116083        | <b>0.292989</b>  | <b>0.004826</b> | 90   |
| SHP  | Sum    | Avg Temp | <b>0.032111</b>  | <b>0.00042</b>  | <b>0.377253</b>  | <b>0.001285</b> | 67   |
| SHP  | Aut    | Avg Temp | -0.00665         | 0.385964        | 0.11672          | 0.276023        | 87   |
| MWA  | pSpr   | Precip   | -0.00024         | 0.008349        | -0.11785         | 0.226688        | 107  |
| MWA  | pSum   | Precip   | 0.000355         | 0.042841        | 0.232038         | 0.016175        | 107  |
| MWA  | pAut   | Precip   | 8.36E-05         | 0.621111        | 0.089872         | 0.357265        | 107  |
| MWA  | Win    | Precip   | 0.000173         | 0.121823        | 0.008165         | 0.933479        | 107  |
| MWA  | Spr    | Precip   | 0.000233         | 0.011273        | 0.151011         | 0.120508        | 107  |
| MWA  | Sum    | Precip   | 9.36E-05         | 0.595923        | 0.119395         | 0.220607        | 107  |
| MWA  | Aut    | Precip   | 2.07E-05         | 0.902821        | 0.073516         | 0.451724        | 107  |

| Site       | Season             | ClimVar                | gls.b1                 | Gls pval               | ols.r                  | ols.pval               | Neff |
|------------|--------------------|------------------------|------------------------|------------------------|------------------------|------------------------|------|
| <b>MWA</b> | <b><i>pSpr</i></b> | <b><i>Avg Temp</i></b> | <b><i>0.02295</i></b>  | <b><i>0.000862</i></b> | <b><i>0.295342</i></b> | <b><i>0.002013</i></b> | 107  |
| MWA        | pSum               | Avg Temp               | 0.013438               | 0.242959               | 0.203539               | 0.054336               | 90   |
| <b>MWA</b> | <b><i>pAut</i></b> | <b><i>Avg Temp</i></b> | <b><i>0.028693</i></b> | <b><i>0.000975</i></b> | <b><i>0.323226</i></b> | <b><i>0.000684</i></b> | 107  |
| MWA        | Win                | Avg Temp               | 0.001761               | 0.767591               | 0.161388               | 0.096772               | 107  |
| MWA        | Spr                | Avg Temp               | -0.00977               | 0.158806               | 0.096397               | 0.323286               | 107  |
| MWA        | Sum                | Avg Temp               | 0.020799               | 0.064716               | 0.245121               | 0.022923               | 86   |
| MWA        | Aut                | Avg Temp               | -0.00841               | 0.337456               | 0.113411               | 0.279074               | 93   |
| <b>PRL</b> | <b><i>pSpr</i></b> | <b><i>Precip</i></b>   | <b><i>-0.00015</i></b> | <b><i>0.002273</i></b> | <b><i>-0.09346</i></b> | <b><i>0.3383</i></b>   | 107  |
| PRL        | pSum               | Precip                 | 0.000194               | 0.102456               | 0.208412               | 0.031223               | 107  |
| <b>PRL</b> | <b><i>pAut</i></b> | <b><i>Precip</i></b>   | <b><i>-0.00023</i></b> | <b><i>0.004684</i></b> | <b><i>-0.05661</i></b> | <b><i>0.562472</i></b> | 107  |
| PRL        | Win                | Precip                 | 1.10E-05               | 0.836622               | -0.08473               | 0.385557               | 107  |
| PRL        | Spr                | Precip                 | 6.91E-05               | 0.189424               | 0.099798               | 0.306425               | 107  |
| PRL        | Sum                | Precip                 | -8.31E-05              | 0.484005               | 0.071281               | 0.465629               | 107  |
| PRL        | Aut                | Precip                 | 0.000172               | 0.035816               | 0.134706               | 0.166556               | 107  |
| <b>PRL</b> | <b><i>pSpr</i></b> | <b><i>Avg Temp</i></b> | <b><i>0.016544</i></b> | <b><i>0.008652</i></b> | <b><i>0.258675</i></b> | <b><i>0.007139</i></b> | 107  |
| PRL        | pSum               | Avg Temp               | -0.00535               | 0.529163               | 0.151811               | 0.157964               | 88   |
| <b>PRL</b> | <b><i>pAut</i></b> | <b><i>Avg Temp</i></b> | <b><i>0.028671</i></b> | <b><i>3.13E-06</i></b> | <b><i>0.405575</i></b> | <b><i>0.00013</i></b>  | 84   |
| PRL        | Win                | Avg Temp               | 0.009131               | 0.035921               | 0.251582               | 0.008949               | 107  |
| PRL        | Spr                | Avg Temp               | -0.01047               | 0.094646               | 0.058044               | 0.552603               | 107  |
| <b>PRL</b> | <b><i>Sum</i></b>  | <b><i>Avg Temp</i></b> | <b><i>0.024494</i></b> | <b><i>0.004172</i></b> | <b><i>0.300957</i></b> | <b><i>0.005406</i></b> | 84   |
| PRL        | Aut                | Avg Temp               | -0.01531               | 0.014263               | 0.131169               | 0.231465               | 85   |

The ols model is a standard linear model using ring width as a response and a climate variable as a predictor. In the ols models, the P-value was calculated against the effective number of samples as described in ref. 1. The gls model was fit with the form above but using a correlation structure fit as a first-order autoregressive process (AR1). The gls model and correlation structure parameters are optimized by iteration. The gls model and correlation structure were fit using package nlme (2) in the R statistical programming environment (3).

The ols and gls approaches for accounting for significant associations in the presence of non-random errors are largely complementary. In all cases, the sign of the correlation coefficient from significant ols models and the sign of the slope in the gls model are the same. The most notable difference between the ols and gls approach is the loss of significance ( $P < 0.01$ ) at site CWL. This difference probably results from more complicated autocorrelation in the ring-width model than in the climate model at CWL. The modeling of higher-order autoregressive and moving average processes is beyond the scope of this paper and does not bear on the overarching results and conclusions.

The computer files that contain the data used in these analyses are available online at the International Tree Ring Databank: <http://www.ncdc.noaa.gov/paleo/treering.html>

gls.b1 = generalized least squares model slope; gls.pval = P-value on gls.b1; ols.r = ordinary least squares correlation coefficient (Pearson's r); ols.pval = P-value using the effective sample size reduced due to autocorrelation (Neff).

Bold-face type indicates significant value for ols at  $P \leq 0.01$ .

Italic type indicates significant value for gls at  $P \leq 0.01$ .

Bold-face and italic type indicates significant value for gls and ols at  $P \leq 0.01$ .

1. Dawdy DR, Matalas NC (1964) Statistical and probability analysis of hydrologic data, part III: Analysis of variance, covariance and time series. *Handbook of Applied Hydrology, a Compendium of Water-Resources Technology*, ed. Chow VT (McGraw-Hill, New York) pp. 8.68–8.90.
2. Pinheiro J, Bates D, DebRoy S, Sarkar D, R Core team (2008). nlme: Linear and nonlinear mixed effects models. R package version 3.1–90.
3. R Development Core Team (2008). R: A language and environment for statistical computing. (R Foundation for Statistical Computing, Vienna).

Table S5. Locations used for the PRISM data in Fig. S5

| Site ID | Name                | Longitude | Latitude | Tree elevation (m) | PRISM elevation (m) |
|---------|---------------------|-----------|----------|--------------------|---------------------|
| 689A    | Hidden Peak         | -111.63   | 40.57    | 3150               | 3103                |
| 685A    | Cedar Breaks        | -113.85   | 37.58    | 3120               | 2881                |
| 02A     | Yosemite Park       | -119.25   | 37.80    | 3000               | 3112                |
| 723A    | Galena Pass         | -114.72   | 43.87    | 2580               | 2616                |
| 731A    | Medicine Bow Peak   | -107.70   | 41.30    | 3150               | 2816                |
| 733A    | Powder River Pass   | -107.05   | 44.15    | 2850               | 2877                |
| 686A    | San Francisco Peaks | -110.20   | 35.43    | 3150               | 1946                |
| 745A    | Sylvan Pass         | -110.13   | 44.37    | 2580               | 2660                |
